# Supplementary material
Source: PubMed Central journal article supplement (PMC6906787)
Supplement: ao9b01771_si_001.pdf [file ao9b01771_si_001.pdf]

## Hybrid Green Bionanocomposites of Bio-based Poly(butylene succinate) Reinforced with Pyrolyzed Perennial Grass Microparticles and Graphene Nanoplatelets

Connor J. Cooper<sup>1,2</sup>, Mohamed A. Abdelwahab<sup>1,3</sup>, Amar K. Mohanty<sup>1,2,\*</sup>, Manjusri Misra<sup>1,2,\*</sup>

<sup>1</sup>School of Engineering, Thornbrough Building, University of Guelph, Guelph, N1G 2W1, Ontario, Canada

<sup>2</sup>Bioproducts Discovery and Development Centre, Department of Plant Agriculture, Crop Science Building, University of Guelph, Guelph, N1G 2W1, Ontario, Canada

<sup>3</sup>Department of Chemistry, Tanta University, Tanta, 31527, Egypt

\* Correspondence to M. Misra, Email: mmisra@uoguelph.ca and Amar K. Mohanty. Email: mohanty@uoguelph.ca

**Figure S1:** Zero shear viscosity (left) and melt flow index (right). Where (A) BioPBS, (B) BioPBS/BC (90/10), (C) BioPBS/BC (85/15), (D) BioPBS/BC (80/20), (E) BioPBS/BC (75/25), (F-G) BioPBS/BC/GnP (MB) (75/24/1) and (75/20/5), respectively, and (H-I) BioPBS/BC/GnP (DC) (75/24/1) and (75/20/5), respectively.

**Table S1:** Thermal data of the neat polymer and composite samples.

**Table S2:** 2<sup>2</sup> analysis of variance of impact strength on GnP content and processing methods, alpha - 0.05.

**Table S3:** 2<sup>2</sup> analysis of variance of tensile strength on of GnP content and processing methods, alpha - 0.05.

**Table S4:** Two-Sample t test, assuming unequal variances, of CLTE and HDT measurements, alpha - 0.05

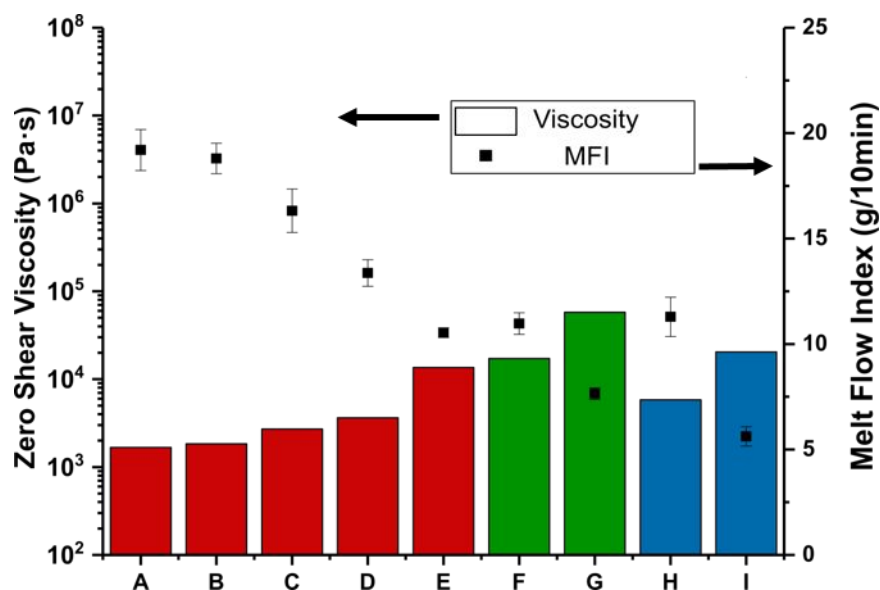

Figure S1. Zero shear viscosity (left) and melt flow index (right). Where (A) BioPBS, (B) BioPBS/BC (90/10), (C) BioPBS/BC (85/15), (D) BioPBS/BC (80/20), (E) BioPBS/BC (75/25), (F-G) BioPBS/BC/GnP (MB) (75/24/1) and (75/20/5), respectively, and (H-I) BioPBS/BC/GnP (DC) (75/24/1) and (75/20/5), respectively.

Table S1. Thermal data of the neat polymer and composite samples.

| Samples                              | $T_m$      | $\Delta H_m$ | $T_c$       | $\Delta H_c$ | Crystallinity (%) |
|--------------------------------------|------------|--------------|-------------|--------------|-------------------|
|                                      | (°C)       | (J/g)        | (°C)        | (J/g)        |                   |
| BioPBS                               | 115.7±0.03 | 70.5 ± 1.63  | 91.2 ± 0.05 | 69.2 ± 0.43  | 34.60             |
| BioPBS/10BC                          | 115.2±0.16 | 57.5 ± 0.44  | 89.4 ± 0.05 | 62.8 ± 0.24  | 28.26             |
| BioPBS/15BC                          | 115.8±0.01 | 50.9 ± 0.39  | 89.8 ± 0.20 | 55.5 ± 0.76  | 23.61             |
| BioPBS/20BC                          | 115.5±0.25 | 48.1 ± 0.54  | 88.4± 0.22  | 52.1± 0.87   | 20.83             |
| BioPBS/25BC                          | 115.6±0.40 | 44.0 ± 0.08  | 87.9 ± 0.29 | 48.6 ± 1.0   | 18.23             |
| BioPBS/24BC/1GnP<br>- master batch - | 114.8±0.57 | 54.3 ± 3.27  | 96.4 ± 0.11 | 51.1 ± 1.1   | 19.15             |
| BioPBS/20BC/5GnP<br>- master batch - | 114.0±0.29 | 54.3 ± 1.53  | 98.8 ± 0.12 | 49.5 ± 0.5   | 18.56             |
| BioPBS/24BC/1GnP<br>- direct -       | 114.9±0.04 | 51.2 ± 0.08  | 95.9 ± 0.11 | 50.6 ± 0.76  | 18.98             |
| BioPBS/20BC/5GnP<br>- direct -       | 115.3±0.85 | 52.4 ± 0.55  | 98.2 ± 0.14 | 51.4 ± 1.3   | 19.27             |
| BioPBS/25GnP<br>- master batch -     | 114.6±1.00 | 51.9 ± 0.47  | 99.3 ± 0.33 | 52.0 ± 0.24  | 19.51             |

Table S2: 2<sup>2</sup> analysis of variance of impact strength on GnP content and processing methods, alpha - 0.05.

2<sup>2</sup> ANOVA with replicates - Impact Strength

| <i>Source of Variation</i> | <i>SS</i> | <i>df</i> | <i>MS</i> | <i>F</i> | <i>P-value</i> | <i>F crit</i> |
|----------------------------|-----------|-----------|-----------|----------|----------------|---------------|
| Process method             | 415.9637  | 1         | 415.9637  | 255.9819 | 2.33E-07       | 5.317655      |
| Amount of GnP              | 123.7198  | 1         | 123.7198  | 76.13656 | 2.33E-05       | 5.317655      |
| Interaction                | 70.15585  | 1         | 70.15585  | 43.17356 | 0.000175       | 5.317655      |
| Within                     | 12.99978  | 8         | 1.624973  |          |                |               |
| Total                      | 622.8391  | 11        |           |          |                |               |

Table S3: 2<sup>2</sup> analysis of variance of tensile strength on of GnP content and processing methods, alpha - 0.05.

2<sup>2</sup> ANOVA with replicates - Tensile Strength

| <i>Source of Variation</i> | <i>SS</i> | <i>df</i> | <i>MS</i> | <i>F</i> | <i>P-value</i> | <i>F crit</i> |
|----------------------------|-----------|-----------|-----------|----------|----------------|---------------|
| Process method             | 11.1005   | 1         | 11.1005   | 11.17031 | 0.004135       | 4.493998      |
| Amount of GnP              | 11.7045   | 1         | 11.7045   | 11.77811 | 0.003422       | 4.493998      |
| Interaction                | 0.0405    | 1         | 0.0405    | 0.040755 | 0.842557       | 4.493998      |
| Within                     | 15.9      | 16        | 0.99375   |          |                |               |
| Total                      | 38.7455   | 19        |           |          |                |               |

**Table S4:** Two-Sample t test, assuming unequal variances, of CLTE and HDT measurements, alpha - 0.05.

|                   | <i>BioPBS/<br/>10BC</i> | <i>BioPBS/<br/>15BC</i> | <i>BioPBS/<br/>20BC</i> | <i>BioPBS/<br/>25BC</i> | <i>BioPBS/<br/>24BC/<br/>1GnP<br/>(MB)</i> | <i>BioPBS/<br/>20BC/<br/>5GnP<br/>(MB)</i> | <i>BioPBS/<br/>24BC/<br/>1GnP<br/>(DC)</i> | <i>BioPBS/<br/>20BC/<br/>5GnP<br/>(DC)</i> |
|-------------------|-------------------------|-------------------------|-------------------------|-------------------------|--------------------------------------------|--------------------------------------------|--------------------------------------------|--------------------------------------------|
| <b>CLTE</b>       | -0.147                  | 9.66                    | 4.60                    | 8.71                    | 10.4                                       | 4.12                                       | 9.85                                       | 9.88                                       |
| <b>t stat</b>     |                         |                         |                         |                         |                                            |                                            |                                            |                                            |
| <b>CLTE</b>       | 12.7                    | 12.7                    | 12.7                    | 4.30                    | 12.7                                       | 12.7                                       | 12.7                                       | 12.7                                       |
| <b>t critical</b> |                         |                         |                         |                         |                                            |                                            |                                            |                                            |
| <b>HDT</b>        | -1.97                   | -6.21                   | -6.77                   | -12.6                   | -8.88                                      | -7.46                                      | -7.57                                      | -8.98                                      |
| <b>t stat</b>     |                         |                         |                         |                         |                                            |                                            |                                            |                                            |
| <b>HDT</b>        | 4.30                    | 12.7                    | 12.7                    | 12.7                    | 12.7                                       | 12.7                                       | 4.30                                       | 12.7                                       |
| <b>t critical</b> |                         |                         |                         |                         |                                            |                                            |                                            |                                            |
